# Supplementary material
Source: MDPI journal article supplement (https://www.mdpi.com/2673-1924/2/2/21)
Supplement: s1 [file s1]

**Table S1.** Dataset of cruise details, MBEs system and configurations, oceanographic data and sampling methods used in this work.

| Case Study           | Cruise                        | Year                | Research Vessel     | Chief of Cruise                                                                    | Multibeam Echosounders (MBEs) Types                                                 | Sub-Bottom Profiler (SBP) | Oceanographic Data                                                                                             | Sampling/ Observation Methods                                                  | Cruise Reference |
|----------------------|-------------------------------|---------------------|---------------------|------------------------------------------------------------------------------------|-------------------------------------------------------------------------------------|---------------------------|----------------------------------------------------------------------------------------------------------------|--------------------------------------------------------------------------------|------------------|
| 1. GALICIA BANK      | Spanish EEZ Mapping Programme | ZEE-2001            | Hespérides          |                                                                                    | Simrad EM-12S<br>13 kHz                                                             | TOPAS                     | Seabird profiling CTD profiles temperature, salinity and dissolved oxygen                                      | Benthic dredges                                                                |                  |
|                      |                               | ZEE-2002            |                     |                                                                                    | Angular coverage = 120°                                                             |                           |                                                                                                                |                                                                                |                  |
|                      |                               | ZEE-2003            |                     |                                                                                    | 81 beams per ping<br>Coverage 2.5 times the water depth                             |                           |                                                                                                                |                                                                                |                  |
|                      |                               | ZEE-2006            | Hespérides          |                                                                                    | Simrad EM-12S<br>13 kHz                                                             | TOPAS                     |                                                                                                                |                                                                                |                  |
|                      |                               | ZEE-2007            |                     |                                                                                    | Angular coverage = 120°                                                             |                           |                                                                                                                |                                                                                |                  |
|                      |                               | ZEE-2008            |                     |                                                                                    | 81 beams per ping<br>Coverage 2.5 times the water depth                             |                           |                                                                                                                |                                                                                |                  |
| BREOGHAM             | 2005                          | Hespérides          | Luis Somoza         | Kongsberg EM-120<br>12 kHz                                                         | TOPAS PS18                                                                          |                           | [1]                                                                                                            |                                                                                |                  |
| DIVA-ARTABRIA II     | 2009                          | Sarmiento de Gamboa | Vituco Urgorri      | Atlas Hydrosweep DS 1×1<br>14–16 kHz                                               | ATLAS PARASOUND P-35                                                                |                           | [2]                                                                                                            |                                                                                |                  |
| 2. GULF OF CÁDIZ     | MVSEIS                        | 2008                | Hespérides          | Luis Somoza                                                                        | Kongsberg EM-120<br>12 kHz                                                          | TOPAS PS18                | ROV-mounted CTD profiles Temperature, salinity, oxygen, fluorescence, turbidity, methane and CO <sub>2</sub> . | ROV 6000 Luso: Two robotic manipulators—1024 × 1024 pixel digital still camera | [4]              |
|                      |                               |                     |                     |                                                                                    | Angular coverage = 150°<br>191 beams per ping<br>Coverage 3–4 times the water depth |                           |                                                                                                                |                                                                                |                  |
|                      | SUBVENT-2 Leg-1               | 2014                | Sarmiento de Gamboa | Luis Somoza                                                                        | Atlas DS 1×1<br>14–16 kHz                                                           | ATLAS PARASOUND P-35      |                                                                                                                |                                                                                |                  |
|                      |                               |                     |                     |                                                                                    | Angular coverage = 140°<br>360 beams per ping<br>Coverage 5.5 times the water depth |                           |                                                                                                                |                                                                                |                  |
| MOUNDFORCE           | 2007                          | L´Atalante          | Luis Somoza         | KONSBURG EM-12 dual<br>13 kHz                                                      | 3.5 kHz CHEOPS                                                                      |                           | [5]                                                                                                            |                                                                                |                  |
|                      |                               |                     |                     | Angular coverage = 150°<br>162 pings per ping<br>Coverage 7.3 time the water depth |                                                                                     |                           |                                                                                                                |                                                                                |                  |
| 3. LANZAROTE PASSAGE | SUBVENT-2 Leg 2               | 2014                | Sarmiento de Gamboa | Luis Somoza                                                                        | Atlas DS 1×1<br>14–16 kHz                                                           | ATLAS PARASOUND P-35      | CTDs and ROV-mounted CTD profiles                                                                              | ROV 6000 Luso                                                                  | [4]              |
|                      |                               |                     |                     |                                                                                    | Angular coverage = 140°                                                             |                           |                                                                                                                |                                                                                |                  |

| Case Study          | Cruise           | Year                     | Research Vessel     | Chief of Cruise  | Multibeam Echosounders (MBEs) Types                                                                               | Sub-Bottom Profiler (SBP) | Oceanographic Data                                                                                               | Sampling/ Observation Methods                                                  | Cruise Reference |
|---------------------|------------------|--------------------------|---------------------|------------------|-------------------------------------------------------------------------------------------------------------------|---------------------------|------------------------------------------------------------------------------------------------------------------|--------------------------------------------------------------------------------|------------------|
|                     |                  |                          |                     |                  | 360 beams per ping<br>Coverage 5.5 times the water depth                                                          |                           | Temperature, salinity, oxygen, fluorescence, turbidity, methane and CO <sub>2</sub> .                            |                                                                                |                  |
| 4. TAGORO VOLCANO   | GAIRE Leg 1 Leg2 | 29/11/2011<br>22/12/2011 | Sarmiento de Gamboa | Luis Somoza      | Atlas DS 1×1<br>14–16 kHz<br>Angular coverage= 140°<br>360 beams per ping<br>Coverage 5.5 times the water depth   | ATLAS PARASOUND P-35      |                                                                                                                  | Water sampling                                                                 | [6]              |
|                     | AMULEY           | 20/07/2012               | Hespérides          | Luis Somoza      | Kongsberg EM-120<br>12 kHz<br>Angular coverage = 150°<br>191 beams per ping<br>Coverage 3–4 times the water depth | TOPAS PS18                |                                                                                                                  |                                                                                | [7]              |
|                     | SUBVENT-2 Leg-2  | 4/04/2014                | Sarmiento de Gamboa | Luis Somoza      | Atlas DS 1×1<br>14–16 kHz<br>Angular coverage = 140°<br>360 beams per ping<br>Coverage 5.5 times the water depth  | ATLAS PARASOUND P-35      | ROV-mounted CTD sensors: Temperature, salinity, oxygen, fluorescence, turbidity, methane and CO <sub>2</sub>     | ROV 6000 Luso: Two robotic manipulators—1024 × 1024 pixel digital still camera | [4]              |
| 5. CANARY SEAMOUNTS | DRAGO0511        | 2011                     | Miguel Oliver       | J. Tomas Vazquez | Kongsberg EM-302<br>30 kHz<br>Angular coverage = 150°<br>492 beams per ping<br>Coverage 6.5 times depth           | TOPAS PS18                |                                                                                                                  | Benthic dredges                                                                | [8]              |
|                     | SUBVENT-1        | 2013                     | Hespérides          | J. Tomas Vazquez | Kongsberg EM-120<br>12 kHz<br>Angular coverage = 150°<br>191 beams per ping<br>Coverage 3–4 times the water depth | TOPAS PS18                | CTDs and rosettes                                                                                                | Benthic dredges                                                                | [9]              |
|                     | SUBVENT-2 Leg-1  | 2014                     | Sarmiento de Gamboa | Luis Somoza      | Atlas DS 1×1<br>14–16 kHz<br>Angular coverage = 140°<br>360 beams per ping<br>Coverage 5.5 times the water depth  | ATLAS PARASOUND P-35      | ROV-mounted sensors: temperature, salinity, oxygen, fluorescence, turbidity, methane and CO <sub>2</sub> sensors | ROV 6000 Luso: Two robotic manipulators—1024 × 1024 pixel digital still camera | [4]              |

**Table S2.** Seabed type, morphology, oceanographic variables, VME Indicator Taxa and seafloor micro-morphologies and habitat types for each of the sites of the case studies.

| Case study/ROV Dive or Dredge Site     | Seabed Type                                                  | Morphology/ Water Depth        | Oceanographic Conditions and Water Mass variables                                                                                                                                                                                                                                                                        | VME Indicator Taxa and Associated Taxa                                                                                                 | VME Habitat Type (FAO Codes-) and Seafloor Micromorphology                                                                                                                              |
|----------------------------------------|--------------------------------------------------------------|--------------------------------|--------------------------------------------------------------------------------------------------------------------------------------------------------------------------------------------------------------------------------------------------------------------------------------------------------------------------|----------------------------------------------------------------------------------------------------------------------------------------|-----------------------------------------------------------------------------------------------------------------------------------------------------------------------------------------|
| 1. GALICIA BANK                        | Phosphorite and ferromanganese crusts on limestones basement | Continental bank 620–1175 mbsl | ENACW (Eastern North Atlantic Central Water): 300–600 mbsl<br>Two cores of Mediterranean Outflow Water (MOW): 800 and 1200 mbsl                                                                                                                                                                                          |                                                                                                                                        | -                                                                                                                                                                                       |
| Breogham Mound Province (DRR_20-27-91) |                                                              | 780–1175 mbsl                  | T = 11–11.5 °C<br>S = 35.9–36.1 psu<br>DO = 5.4–5.5 mL·L <sup>-1</sup><br>$\delta_0$ = 27.353–27.431 kg·m <sup>-3</sup><br>Speed = 5–10 cm·s <sup>-1</sup>                                                                                                                                                               | Living <i>Desmophyllum pertusum</i> and <i>Madrepora oculata</i><br><b>Scleractinians</b><br><b>Bryozoans</b>                          | <b>SCLERACTINIAN BIOHERMS (CSS)</b><br>Semiburied stepped 10–12 m in height and widths of 500 m on slopes 2–4°.<br>Living Scleractinian mini-mounds 2–4 m in height and widths of 500 m |
| Castelao Mound Province (DRR_25-26-28) |                                                              | 830–860 mbsl                   | T = 11.25 °C<br>S = 35.8–35.9 psu<br>DO = 5.55 mL·L <sup>-1</sup><br>$\delta_0$ = 27.353–27.431 kg·m <sup>-3</sup>                                                                                                                                                                                                       | Living <i>Desmophyllum pertusum</i> and <i>Madrepora oculata</i><br><b>Scleractinians</b>                                              | <b>SCLERACTINIAN BIOHERMS (CSS)</b><br>Cluster of living Scleractinian mini mounds                                                                                                      |
| 2. GULF OF CÁDIZ                       | Hydrocarbon seeps, mud breccia sediments and MDCs carbonates | Cold seeps, Mud volcanoes      | Mediterranean Outflow Water (MOW): T = 13 °C; S = 36.5 psu<br>Mediterranean Upper Water (MU): 500–800 mbsl<br>Speed = 46 cm·s <sup>-1</sup><br>Mediterranean Lower Water (ML): 750–1200 mbsl<br>Speed = 20–30 cm·s <sup>-1</sup><br>North Atlantic Deep Water (NADW): 1500–3000 mbsl<br>T = 3–8 °C<br>S = 34.95–35.2 psu |                                                                                                                                        |                                                                                                                                                                                         |
| Mercator MV (SV2_D02)                  | Soft muddy sediment                                          | 350–360mbsl                    | T = 12.5 °C<br>S = 35.75 psu<br>DO % saturation = 90.5%<br>DO = 9.65 mL·L <sup>-1</sup>                                                                                                                                                                                                                                  | <b>Desmosponges</b><br><i>Geodia</i> sp.<br><i>Phakellia</i> sp.                                                                       | <b>DEEP-SEA SPONGE AGGREGATIONS (DMO)</b><br>MDAC blocks (up to 1 m) on the summit with abundant desmosponges                                                                           |
|                                        | Muddy to silty areas                                         | 350 mbsl                       | Methane concentrations = 41.93–47.63 nM                                                                                                                                                                                                                                                                                  | <b>Chemosynthesis-based communities:</b><br>Sulfur-oxidizing bacterial (SOB) mats<br>Chemosymbiotic bivalves: <i>Lucinoma asapheus</i> | <b>CHEMOSYNTHESIS-BASED HABITATS (CXV)</b><br>Pockmarks 1–3 m in diameter                                                                                                               |
|                                        | Soft muddy sediment                                          | 365–370 mbsl                   |                                                                                                                                                                                                                                                                                                                          | <b>Pennatulacea (sea-pens)</b><br><i>Funiculina quadrangularis</i>                                                                     | <b>SEA-PEN COMMUNITIES (NTW)</b><br>Abundant sea-pens around the summit                                                                                                                 |
|                                        | Soft muddy sediment                                          | 370–380 mbsl                   |                                                                                                                                                                                                                                                                                                                          | <b>Cerianthids</b><br><b>Annelids</b><br><i>Hyalinocia tubicola</i> .                                                                  | <b>CERIANTHID COMMUNITIES</b> Pockmarks with abundant Cerianthids and annelids on the flanks                                                                                            |

|                                   |                                                |                                 |                                                                                                                                                                    |                                                                                                                                                                                                                                                                                 |                                                                                                                                                 |
|-----------------------------------|------------------------------------------------|---------------------------------|--------------------------------------------------------------------------------------------------------------------------------------------------------------------|---------------------------------------------------------------------------------------------------------------------------------------------------------------------------------------------------------------------------------------------------------------------------------|-------------------------------------------------------------------------------------------------------------------------------------------------|
| <b>Yuma MV</b><br>(SV2_D09)       | Soft muddy sediment with scattered MDACs rocks | Mud volcano summit<br>1092 mbsl | T = 9.67–9.96 °C<br>S = 35.7–36.1 psu<br>DO = 4.73–5.08 mL·L <sup>-1</sup><br>δ <sub>0</sub> = 32.05 kg·m <sup>-3</sup><br>Methane concentrations = 44.07–50.33 nM | <b>Chemosynthesis-based communities:</b><br>Siboglinid tubeworms<br>Sulfur-oxidizing bacterial (SOB) mats<br><b>Chemosymbiotic bivalves:</b><br><i>Acharax gadirae</i> , <i>Thyasira vulcolutre</i>                                                                             | <b>CHEMOSYNTHESIS-BASED HABITATS (CXV)</b><br>Sub-circular micro-mud mounds at the summit                                                       |
|                                   | Soft muddy sediment                            |                                 |                                                                                                                                                                    | <b>Lithistid sponges</b><br><b>Pennatulacea (sea pens):</b> <i>Kophobelemnon</i> sp., <i>Pennatula</i> sp.<br><b>Cerianthids</b><br><b>Gorgonians:</b> <i>Radicipes</i> sp.<br><b>Holothurians</b><br><b>Decapods:</b> <i>Paramola cuvieri</i> , <i>Aristaeomorpha foliacea</i> | <b>SEA-PEN COMMUNITIES (NTW) &amp; DEEP-SEA SPONGE AGGREGATIONS (LITHISTID) (LITH)</b><br>Micro mud mounds                                      |
|                                   | MDACs slabs and blocks                         |                                 |                                                                                                                                                                    | <b>Gorgonians</b><br><b>Scleractinians</b>                                                                                                                                                                                                                                      | <b>AGGREGATIONS OF GORGONIANS (GGW) &amp; SCLERACTINIANS (CSS)</b><br>Gorgonians (GGW) and Scleractinians (CSS) colonizing MDAC slabs           |
| <b>Las Negras MV</b><br>(SV2_D05) | Muddy areas                                    | Mud volcano<br>1360 mbsl        | T = 9.5 °C<br>S = 36.00 psu<br>DO = 5.25 mL·L <sup>-1</sup><br>δ <sub>0</sub> = 34.90 kg·m <sup>-3</sup><br>Methane concentration = 39.69–47.60 nM                 | <b>Chemosynthesis-based habitats:</b><br><b>Chemosymbiotic bivalves:</b><br><i>Thyasira vulcolutre</i> ,<br><i>Isorropodon megadesmus</i> ,<br><i>Bathymodiolus mauritanicus</i>                                                                                                | <b>CHEMOSYNTHESIS-BASED HABITATS (CXV)</b><br>Pockmarks depressions with graveyards of <i>Bathymodiolus mauritanicus</i> shells                 |
|                                   | Soft muddy sediments                           |                                 |                                                                                                                                                                    | <b>Pennatulacea (sea-pens):</b> <i>Kophobelemnon</i> , <i>Pennatula</i> , <i>Anthoptilum</i><br><b>Cerianthids</b><br><b>Holothurians</b><br><b>Decapods:</b> <i>A. foliacea</i> , <i>Plesiopenaeus edwardsianus</i>                                                            | <b>SEA-PEN COMMUNITIES (NTW)</b><br>Flat seafloor and micro-mounds                                                                              |
|                                   | MDACs pavements and slabs                      |                                 |                                                                                                                                                                    | <b>Soft corals</b><br><b>Desmosponges</b><br><b>Anemones</b>                                                                                                                                                                                                                    | <b>AGGREGATIONS OF SOFT CORALS (AJZ) &amp; DESMOSPONGES (DMO)</b>                                                                               |
| <b>Madrid MV</b><br>(SV2_D08)     | Muddy sediments with some gravels              | Mud volcano<br>1390 mbsl        | T = 8.8–9.18°C<br>S = 36.06 psu<br>DO = 4.87–5.55 mL·L <sup>-1</sup><br>δ <sub>0</sub> = 34.10 kg·m <sup>-3</sup><br>Methane concentration = 48.53 nM              | <b>Chemosynthesis-based communities:</b><br><b>Chemosymbiotic bivalves:</b> <i>A. gadirae</i> , <i>Solemya elarraichensis</i>                                                                                                                                                   | <b>CHEMOSYNTHESIS-BASED HABITATS (CXV)</b><br>Subcircular micro-mounds                                                                          |
|                                   | MDACs pavements and slabs                      |                                 |                                                                                                                                                                    | <b>Isolated gorgonians</b><br><b>Scleractinians:</b><br><i>Solenosmilia variabilis</i> , <i>Madrepora oculata</i>                                                                                                                                                               | <b>AGGREGATIONS OF GORGONIANS (GGW) &amp; SCLERACTINIANS (CSS)</b><br>Gorgonians and scleractinians on large MDACs slabs, up to 1 m in diameter |
|                                   | Soft muddy–silty sediments                     |                                 |                                                                                                                                                                    | <b>Cerianthids</b><br><b>Holothurians</b>                                                                                                                                                                                                                                       | <b>CERIANTHID COMMUNITIES (CTC)</b><br>Soft slope sediments (mud-silt)                                                                          |
|                                   | Anthropogenic Remains: sunken iron             |                                 |                                                                                                                                                                    | <b>Solitary scleractinians:</b> <i>Desmophyllum dianthus</i><br><b>Hydrozoans</b><br><b>Small gorgonians</b>                                                                                                                                                                    | Anthropogenic remains (e.g., iron bars, glass bottles) colonized by gorgonians and solitary cup corals                                          |

|                                                                           |                                    |                                                                                                                            |                                                                                                                                                                                                                                                                            |                                                                                                                                                                                                                                                                  |
|---------------------------------------------------------------------------|------------------------------------|----------------------------------------------------------------------------------------------------------------------------|----------------------------------------------------------------------------------------------------------------------------------------------------------------------------------------------------------------------------------------------------------------------------|------------------------------------------------------------------------------------------------------------------------------------------------------------------------------------------------------------------------------------------------------------------|
| <b>Algael MV</b><br>(SV2_D10, SV2_D11)                                    | Mud volcano<br>summit<br>775 mbsl  | T = 10–10.10 °C<br>S = 35.75 psu<br>DO = 4.55–5.02 mL·L <sup>-1</sup><br>δ <sub>0</sub> = 31.058–31.258 kg·m <sup>-3</sup> |                                                                                                                                                                                                                                                                            |                                                                                                                                                                                                                                                                  |
| Soft muddy areas                                                          | Summit<br>775–780 mbsl             | Methane concentration = 49.90 nM                                                                                           | <b>Annelida:</b><br><i>Siboglinum</i> sp.                                                                                                                                                                                                                                  | <b>CHEMOSYNTHESIS-BASED HABITATS (CXV-SZS)</b><br>Scattered scleractinian rubbles colonized by Siboglinids                                                                                                                                                       |
| Soft muddy areas                                                          | Southern flank<br>790–785 mbsl     |                                                                                                                            | <b>Chemosynthesis-based communities:</b><br><b>Molluscs:</b><br>Shells of <i>Bathymodiolus mauritanicus</i><br><b>Hydrozoans</b>                                                                                                                                           | <b>CHEMOSYNTHESIS-BASED HABITATS (CXV-DMK)</b><br>Extensive pools of <i>Bathymodiolus mauritanicus</i> shells colonized by hydrozoans                                                                                                                            |
| Soft muddy areas and shells remains<br>Active degassing seeps             | Northern flank 820–810 mbsl        | Methane concentration = 97.60 nM                                                                                           | <b>Chemosynthesis-based communities:</b><br><b>Molluscs:</b><br><i>Bathymodiolus mauritanicus</i> , <i>Solemya elarraichensis</i> ,<br><i>Isorropodon</i> sp.<br><b>Annelida:</b><br><i>Siboglinum</i> sp.                                                                 | <b>CHEMOSYNTHESIS-BASED HABITATS (CXV-DMK)</b><br>Extensive beds of living <i>Bathymodiolus mauritanicus</i> colonized by hydrozoans<br>Circular pools (pockmarks) or linear fissures up to 10 m diameter on bioclastic and MDACs blocks                         |
| Coral rubbles and MDACs blocks up to 1 m                                  | 780–790 mbsl<br>Southern flank     |                                                                                                                            | <b>Soft corals (Alcyonacea)</b><br><b>Gorgonians:</b> <i>Swiftia</i> sp.<br><b>Bamboo corals:</b> <i>Chelidonopsis</i> , <i>Acanella</i><br><b>Antipatharians (black corals):</b><br><i>Bathypathes</i> , <i>Leiopathes</i> , <i>Stichopathes</i> .<br><b>Desmosponges</b> | <b>AGGREGATIONS OF SOFT CORALS (AJZ) &amp; BAMBOO CORALS (GGW)</b><br>Scleractinian coral rubbles ( <i>D. pertusum</i> ) and small blocks of MDACs mainly colonized by living small soft corals and bamboo corals                                                |
| MDACs gravels                                                             | 780–820 mbsl<br>Northwestern flank |                                                                                                                            | <b>Antipatharians (black corals):</b> <i>Bathypathes</i> , <i>Leiopathes</i><br><b>Soft corals (Alcyonacea)</b><br><b>Gorgonians:</b> <i>Swiftia</i> sp.<br><b>Actinarians</b><br><b>Sponges</b>                                                                           | <b>AGGREGATIONS OF ANTIPATHARIANS (AQZ) ON MDAC ROCKS</b><br>Small and large MDACs colonized by black corals and sponges                                                                                                                                         |
| Muddy sediments with scattered patches of coral rubbles and MDACs gravels | 820–840 mbsl<br>Northern flank     |                                                                                                                            | <b>Hexactinellid sponges:</b> <i>Pheronema</i> , <i>Hyalonema</i><br><b>Soft corals (Alcyonacea)</b><br><b>Gorgonians:</b> <i>Swiftia</i> sp.<br><b>Antipatharians (black corals):</b><br><i>Paranthipathes</i> , <i>Stichopathes</i>                                      | <b>DEEP-SEA SPONGE AGGREGATIONS (HEXACTINELLID)(HXY)</b><br>Shells and scleractinian rubbles colonized by Hexactinellid sponges gorgonians and antipatharians                                                                                                    |
| <b>Northern Pompeia Coral</b><br>(SV2_D03)                                | Coral ridge<br>860–870 mbsl        | T = 10 °C<br>S = 35.75 psu<br>DO = 5.0 mL·L <sup>-1</sup><br>δ <sub>0</sub> = 31.5 kg·m <sup>-3</sup>                      | <b>Scleractinian frameworks</b><br><i>Desmophyllum pertusum</i> and <i>Madrepora oculata</i><br><b>Stony Octocorals:</b> <i>Corallium tricolor</i>                                                                                                                         | <b>RELICT SCLERACTINIAN REEFS COLONIZED BY STONY OCTOCORALS</b><br>Semi-buried scleractinian frameworks ( <i>D. pertusum</i> and <i>M. oculata</i> ) forming reefs colonized by living stony octocorals. Buried mounds up to 30 m identified on seismic sections |

|                                     |                                                         |                                                         |                                                                                                                                                      |                                                                                                                                                                                                                                                                                                                                     |                                                                                                                                                                                      |
|-------------------------------------|---------------------------------------------------------|---------------------------------------------------------|------------------------------------------------------------------------------------------------------------------------------------------------------|-------------------------------------------------------------------------------------------------------------------------------------------------------------------------------------------------------------------------------------------------------------------------------------------------------------------------------------|--------------------------------------------------------------------------------------------------------------------------------------------------------------------------------------|
|                                     |                                                         | 860–870 mbsl                                            | Methane concentration = 41.93 and 43.24 nM                                                                                                           | <b>Chemosynthesis-based communities:</b><br><b>Chemosymbiotic bivalves:</b> <i>Lucinoma asapheus</i> , <i>Thyasira vulcolutre</i><br>Scattered bacterial mats ( <i>Beggiatoa</i> -like sulfur oxidisers)                                                                                                                            | <b>CHEMOSYNTHESIS-BASED HABITATS (CXV)</b><br>Patches of chemosymbiotic bivalves shells and bacterial mats                                                                           |
| <b>Bomjardim MV</b><br>(SV2_D07)    | Muddy areas                                             | Mud volcano Summit<br>3000 mbsl                         | T = 3.20 °C<br>S = 35.15 psu<br>DO = 0.64 mL·L <sup>-1</sup><br>δ <sub>0</sub> = 39.966 kg·m <sup>-3</sup><br>Methane concentration = 20.18–28.12 nM | <b>Chemosynthesis-based communities:</b><br><i>Isorropodon megadesmus</i><br><b>Decapods:</b><br><i>Munidopsis</i> sp.                                                                                                                                                                                                              | <b>CHEMOSYNTHESIS-BASED HABITATS (CXV)</b><br>Abundant shells of chemosymbiotic bivalves                                                                                             |
|                                     |                                                         |                                                         |                                                                                                                                                      | <b>Annelids:</b> Siboglinidae<br><b>Hormathiid actinians:</b> <i>Actinauge</i> sp.<br><b>Holothurians:</b> <i>Mesothuria</i><br><b>Fishes:</b> <i>Bathypterois</i>                                                                                                                                                                  | <b>CHEMOSYNTHESIS-BASED HABITATS (CXV)</b><br>Soft bottoms on the flanks with siboglinid worms                                                                                       |
| <b>3. PASSAGE OF LANZAROTE</b>      | Recent volcanic rocks (ca. 1 Ma) and salt/shale diapirs | Submarine hills within oceanic passage<br>838–1530 mbsl | North Atlantic Central Water (NACW) 600 mbsl<br>Antarctic Intermediate Water (AAIW) 600–1100 mbsl<br>Mediterranean Water (MW) 900 mbsl—bottom        |                                                                                                                                                                                                                                                                                                                                     |                                                                                                                                                                                      |
| <b>M1 dome</b><br>(SV2_DV12)        | Soft muddy areas on salt diapirs                        | Sub-rounded submarine seamount<br>828 mbsl              | T = 10–10.10 °C<br>S = 35.75 psu<br>DO = 4.80 mL·L <sup>-1</sup><br>δ <sub>0</sub> = 31.058 kg·m <sup>-3</sup>                                       | <b>Hexactinellid sponges</b><br><i>Phoronema carpenieri</i><br><b>Venus fly-trap anemones</b>                                                                                                                                                                                                                                       | <b>DEEP-SEA SPONGE AGGREGATIONS (HEXACTINELLID)(HXY) &amp; ACTINIARIAN COMMUNITIES (ATX)</b><br>Soft muddy bottoms                                                                   |
|                                     | Soft muddy areas with scattered volcanic rocks          |                                                         |                                                                                                                                                      | <b>Starfishes:</b><br>Brissingid<br><i>Nymphaster arenatus</i><br><b>Stony Octocorals:</b> <i>Corallium</i> spp.<br><b>Bamboo corals:</b> <i>Acanella arbuscula</i><br><b>Decapod crustaceans:</b><br><i>A. foliacea</i> , <i>P. edwardsianus</i><br><b>Holothurians:</b> <i>Mesothuria</i><br><b>Sea urchins:</b> <i>Araeosoma</i> | Mud-silt bottom with scattered blocks. Benthic fauna colonizing small blocks of volcanic rocks. Starfishes on muddy-silty sediments                                                  |
| <b>Volcanic ridge</b><br>(SV2_DV13) | Old volcanic rocks                                      | Submarine ridge<br>1019–1092 mbsl                       | T = 7.3–7.73 °C<br>S = 35.35 psu<br>DO = 4.33 mL·L <sup>-1</sup><br>δ <sub>0</sub> = 32.425 kg·m <sup>-3</sup>                                       | <b>Stony Octocorals:</b><br><i>Corallium tricolor</i><br><i>Corallium niobe</i><br><b>Soft corals (Alcyonacea)</b><br><b>Gorgonians:</b> <i>Swiftiasp.</i><br><b>Crinoids</b>                                                                                                                                                       | <b>AGGREGATIONS OF STONY OCTOCORALS (CSS) AND SOFT CORALS</b><br>Aggregations of stony octocorals, soft corals and gorgonians aligned to S–N currents on volcanic rocks promontories |
|                                     |                                                         |                                                         |                                                                                                                                                      | <b>Isolated bamboo corals:</b> <i>Acanella arbuscula</i><br><b>Pennatulacea (sea-pens):</b> <i>Pennatula</i>                                                                                                                                                                                                                        | <b>SEA-PENS COMMUNITIES (NTW) WITH BAMBOO CORALS</b><br>Soft muddy bottoms with abundant coral rubbles                                                                               |

|                                              |                                                                            |                                       |                                                                                                                                                                                                                                                                                                                                                                                                                                                                                                                          |                                                                                                                                                                                                                                                                                             |                                                                                                                                                                                           |
|----------------------------------------------|----------------------------------------------------------------------------|---------------------------------------|--------------------------------------------------------------------------------------------------------------------------------------------------------------------------------------------------------------------------------------------------------------------------------------------------------------------------------------------------------------------------------------------------------------------------------------------------------------------------------------------------------------------------|---------------------------------------------------------------------------------------------------------------------------------------------------------------------------------------------------------------------------------------------------------------------------------------------|-------------------------------------------------------------------------------------------------------------------------------------------------------------------------------------------|
| <b>Eastern Twin Pool (ETP)</b><br>(SV2_DV14) | Muddy and sandy areas                                                      | Circular depression<br>1279–1270 mbsl | T = 7.33–7.73 °C<br>S = 35.35 psu<br>DO = 4.08–4.62 mL·L <sup>-1</sup><br>δ <sub>0</sub> = 32.433 kg·m <sup>-3</sup>                                                                                                                                                                                                                                                                                                                                                                                                     | <b>Soft bottom sponges:</b> <i>Thenaea</i><br><b>Cerianthids</b><br><b>Echinoderms:</b> <i>Ceramaster</i> , <i>Mesothuria</i> , <i>Araeosoma</i><br><b>Crustacean decapods:</b><br><i>A. foliacea</i> , <i>P. edwardsianus</i> , <i>Plesionika</i> sp.<br><b>Large scalpellid barnacles</b> | Sandy and muddy seabed with soft and carbonated flagstones                                                                                                                                |
|                                              |                                                                            |                                       |                                                                                                                                                                                                                                                                                                                                                                                                                                                                                                                          | <b>Desmosponges</b><br><b>Pachastrellid-like sponges</b><br><b>Solitary scleractinians</b><br><i>Caryophyllia</i><br><b>Hydroids</b>                                                                                                                                                        |                                                                                                                                                                                           |
| <b>Volcancito</b><br>(SV2_DV15)              | Volcanic rocks                                                             | Volcanic hill<br>1119–1265 mbsl       | T = 7.44–7.70 °C<br>S = 35.35 psu<br>DO = 4.32 mL·L <sup>-1</sup><br>δ <sub>0</sub> = 32.725 kg·m <sup>-3</sup>                                                                                                                                                                                                                                                                                                                                                                                                          | <b>Stony Octocorals:</b><br><i>Corallium tricolor</i> and <i>C. niobe</i><br><b>Hexactinellid and lithistid sponges</b><br><b>Soft corals (Alcyonacea)</b><br><b>Gorgonians:</b> <i>Swiftia</i> sp.<br><b>Plexaurid gorgonians.</b>                                                         | <b>AGGREGATIONS OF STONY OCTOCORALS (CSS), GORGONIANS and SOFT CORALS (AJZ)</b><br>Stony octocorals, soft corals, gorgonians aligned along the S–N undercurrents on volcanic promontories |
|                                              |                                                                            |                                       |                                                                                                                                                                                                                                                                                                                                                                                                                                                                                                                          |                                                                                                                                                                                                                                                                                             |                                                                                                                                                                                           |
| <b>4. TAGORO VOLCANO</b>                     | Recent volcanic rocks                                                      | Summit<br>89–120 mbsl                 | T = 18.75 °C<br>S = 36.92 psu<br>DO = 7.88 mL·L <sup>-1</sup><br>δ <sub>0</sub> = 26.98 kg·m <sup>-3</sup>                                                                                                                                                                                                                                                                                                                                                                                                               | Orange-brown Fe-oxidising bacteria                                                                                                                                                                                                                                                          | <b>CHEMOSYNTHESIS-BASED HABITATS (CXV)/HYDROTHERMAL VENTS (HORNITOS)</b><br>Active degassing CO <sub>2</sub><br>Chimneys 5 m<br>Low T hydrothermal habitats                               |
|                                              |                                                                            |                                       |                                                                                                                                                                                                                                                                                                                                                                                                                                                                                                                          |                                                                                                                                                                                                                                                                                             |                                                                                                                                                                                           |
| <b>5. CANARY ISLANDS SEAMOUNTS</b>           | Ferromanganese crust on old volcanic rocks (91–119 Ma)                     | Flanks<br>150–200 mbsl                | T = 13.82 °C<br>S = 36.10 psu<br>DO = 6.44 mL·L <sup>-1</sup><br>δ <sub>0</sub> = 27.5 kg·m <sup>-3</sup>                                                                                                                                                                                                                                                                                                                                                                                                                | <b>Molluscs:</b> <i>Neopycnodonte cochlear</i><br><b>Annelids:</b> Serpulids<br><b>Crustacean decapods:</b> <i>Plesionika</i><br><b>Fishes:</b> <i>Conger conger</i> , <i>Gymnothorax</i>                                                                                                   | <b>VOLCANIC CAVES</b><br>Fauna living on caves formed by accumulation of recent lava floating bombs and lava bulbous flows                                                                |
|                                              |                                                                            |                                       |                                                                                                                                                                                                                                                                                                                                                                                                                                                                                                                          |                                                                                                                                                                                                                                                                                             |                                                                                                                                                                                           |
| <b>5. CANARY ISLANDS SEAMOUNTS</b>           | Ferromanganese crust on old volcanic rocks (91–119 Ma)                     | Seamounts                             | North Atlantic Central Water (NACW): 100–700 mbsl.<br>South Arctic Intermediate Water (SAIW) to the south: 400–900 mbsl<br>Antarctic Intermediate Water: 700–1000 mbsl.<br>Antarctic Intermediate Water (AAIW) to the north: 1000–1500 mbsl<br>Mediterranean Water (MW) to the south: 800–1400 mbsl<br>North Atlantic Deep Water (NADW): 1500–3800 mbsl<br>Antarctic Bottom Water (AABW): 3800–5100 mbsl<br>Oxygen minimum zone:<br>DO = 2.5–3.5 mL·L <sup>-1</sup> (ca. 750 m)<br>DO = 5 mL·L <sup>-1</sup> (3000 mbsl) |                                                                                                                                                                                                                                                                                             |                                                                                                                                                                                           |
|                                              |                                                                            |                                       |                                                                                                                                                                                                                                                                                                                                                                                                                                                                                                                          |                                                                                                                                                                                                                                                                                             |                                                                                                                                                                                           |
| <b>Echo Seamount</b>                         | Volcanic and subvolcanic alkaline rocks: trachytes, phonolites and basalts | 350–3700 mbsl                         |                                                                                                                                                                                                                                                                                                                                                                                                                                                                                                                          |                                                                                                                                                                                                                                                                                             |                                                                                                                                                                                           |

|                                                           |                                                                                  |                          |                                                                                                                                                                                                                                                                                                                                                                            |                                                                                                                                                                                                                                                               |
|-----------------------------------------------------------|----------------------------------------------------------------------------------|--------------------------|----------------------------------------------------------------------------------------------------------------------------------------------------------------------------------------------------------------------------------------------------------------------------------------------------------------------------------------------------------------------------|---------------------------------------------------------------------------------------------------------------------------------------------------------------------------------------------------------------------------------------------------------------|
|                                                           |                                                                                  |                          | <b>Scleractinians:</b><br><i>Dendrophyllia cornigera</i><br><b>Antipatharian (black corals):</b> <i>Stichopathes</i><br><b>Desmosponges:</b><br><i>Pachastrella, Poecillastra</i><br><b>Molluscs:</b><br><i>Asperarca nodulosa, Clelandella</i> , muricids<br><b>Small hydroids:</b><br><b>Echinoderms:</b><br>Cidarids<br>Crinoids<br><i>Thalassometra cf. lusitanica</i> | <b>AGGREGATIONS OF SCLERACTINIANS (CSS) AND ANTIPATHARIANS (AQZ)</b><br>Smooth seabed covered by ferromanganese crusts, and volcanic rocks with high abundance of sponges, scleractinians and black corals as well as a high diversity of small invertebrates |
| (DR05–DR06)                                               | Summit<br>310–362 mbsl                                                           |                          |                                                                                                                                                                                                                                                                                                                                                                            |                                                                                                                                                                                                                                                               |
| (DR02)                                                    | Northern flank<br>1875–1890 mbsl                                                 |                          | <b>Octocorals:</b> Bamboo corals                                                                                                                                                                                                                                                                                                                                           | <b>AGGREGATIONS OF BAMBOO CORALS (GGW)</b><br>Ferromanganese crust with very few fauna and bamboo corals                                                                                                                                                      |
| (DR04)                                                    | Southern flank<br>1593–1832 mbsl                                                 |                          | <b>Gorgonians:</b> <i>Metallogorgia melanotrichos</i><br><b>Antipatharians (black corals):</b> <i>Bathypathes</i><br><b>Solitary and colonial scleractinians:</b><br><i>Desmophyllum</i> -like corals, <i>Solenosmilia variabilis</i><br><b>Bamboo corals</b><br><b>Large brachiopods</b>                                                                                  | <b>AGGREGATIONS OF GORGONIANS, ANTIPATHARIANS (AQZ) AND BAMBOO CORALS (GGW)</b><br>Ferromanganese crust and coral rubbles with high abundance of benthic fauna                                                                                                |
| <b>The Paps Seamount</b>                                  | Volcanic cones formed by alkaline volcanic rocks (cinerites, lapilli and scoria) | 1600–4300 mbsl           |                                                                                                                                                                                                                                                                                                                                                                            |                                                                                                                                                                                                                                                               |
| DR07 (1860 m)<br>DR08 (1964–1975 m)<br>DR11 (1952–1957 m) | Ferromanganese crust                                                             | Summit<br>1860–1952 mbsl | <b>Gorgonians:</b><br><i>Metallogorgia melanotrichos, Chrysogorgia, Paramuricea</i><br><b>Hexactinellid sponges:</b> <i>Aphrocallistes</i><br><b>Bamboo corals</b><br><b>Soft corals:</b> <i>Anthomasthus</i><br><b>Crustaceans:</b> <i>Munidopsis</i><br><b>Ophiuroids</b> (attached to gorgonians): <i>Ophiocreas, Asteroschema</i><br><b>Antedonidae crinoids</b>       | <b>AGGREGATIONS OF GORGONIANS (GGW) &amp; DEEP-SEA HEXACTINELLID SPONGES (HXY)</b><br>Summit covered by ferromanganese crust colonized by large deep-sea gorgonians with abundant epibionts and abundance of hexactinellid sponges                            |
| DR10                                                      | Northern flank<br>2839–3010 mbsl                                                 |                          | <b>Hexactinellid sponges</b><br><b>Gorgonians:</b> <i>M. melanotrichos</i><br><b>Ophiuroids:</b> <i>Ophiocreas, Asteroschema</i><br><b>Brisingid and goniasterid starfishes</b>                                                                                                                                                                                            | <b>AGGREGATIONS OF GORGONIANS (GGW) &amp; DEEP-SEA HEXACTINELLID SPONGES (HXY)</b><br>Flanks with ferromanganese crusts incised by gullies                                                                                                                    |



|                                             |                                                                                                              |                                        |                                                                                                                                                                                                                                                                                                                                       |                                                                                                                                                                                                                                                            |
|---------------------------------------------|--------------------------------------------------------------------------------------------------------------|----------------------------------------|---------------------------------------------------------------------------------------------------------------------------------------------------------------------------------------------------------------------------------------------------------------------------------------------------------------------------------------|------------------------------------------------------------------------------------------------------------------------------------------------------------------------------------------------------------------------------------------------------------|
| <b>The Tropic Seamount</b>                  | Alkaline basalts, phonolites and cinerites cones                                                             | 1000–4200 mbsl                         |                                                                                                                                                                                                                                                                                                                                       |                                                                                                                                                                                                                                                            |
| DR17 (1004–1007 m);<br>DR18 (1137–190 m)    |                                                                                                              | Summit<br>190–1137 mbsl                | <b>Scleractinians:</b><br><i>Solenosmilia variabilis</i> ,<br><i>Desmophyllum</i> -like solitary corals<br><b>Bamboo corals:</b> <i>Acanella</i> , <i>Keratoisis</i><br><b>Hexactinellid sponges:</b> <i>Poliopogon amadou</i><br><b>Annelids:</b> mainly eunicids<br><b>Stalked crinoids:</b><br><i>Endoxocrinus wyvillethomsoni</i> | <b>AGGREGATIONS OF SCLERACTINIANS(CSS) AND BAMBOO CORALS (GGW), DEEP-SEA HEXACTINELLID SPONGE AGGREGATIONS (HXY)</b><br>Fe-Mn crusts and carbonate-phosphorite pavements colonized by scleractinians and large colonies of bamboo corals (up 60 cm long)   |
| DR16                                        |                                                                                                              | Eastern flank<br>1719 mbsl             | <b>Scleractinians:</b><br><i>Solenosmilia variabilis</i> , <i>Desmophyllum</i> -like solitary corals<br><b>Antipatharians (black corals):</b> <i>Bathypathes</i><br><b>Hexactinellid sponges</b><br><b>Ophiuroids</b><br><b>Polychaetes</b><br><b>Crustaceans:</b><br><i>Munidopsis</i> , balanids, pandalid shrimps                  | <b>AGGREGATIONS OF SCLERACTINIANS (CSS) AND ANTIPATHARIANS (AQZ), DEEP-SEA HEXACTINELLID SPONGE AGGREGATIONS (HXY)</b><br>Ferromanganese crusts with abundant coral rubble colonized by <i>S. variabilis</i> and <i>Desmophyllum</i> -like solitary corals |
| DR15                                        |                                                                                                              | Lower southern flank<br>2263–2287 mbsl | <b>Bamboo corals:</b> <i>Acanella</i> , <i>Keratoisis</i><br><b>Hexactinellid sponges</b>                                                                                                                                                                                                                                             | <b>AGGREGATIONS OF BAMBOO CORALS (GGW) &amp; DEEP-SEA HEXACTINELLID SPONGE AGGREGATIONS (HXY)</b><br>Ferromanganese crusts                                                                                                                                 |
| <b>Drago Seamount</b><br>DR13 (2290–2426 m) | Tops composed of several small volcanic cones formed by alkaline basalts, tephrites and volcanoclastic rocks | Summit<br>2200–4300 mbsl               | <b>Stony Octocorals:</b> <i>Corallium</i> spp.<br><b>Gorgonians:</b> <i>M. melanotrichos</i><br>Small unidentified gorgonians<br><b>Hexactinellid sponges:</b> <i>Aphrocallistes</i> , <i>Regadrella</i>                                                                                                                              | <b>AGGREGATIONS OF STONY OCTOCORALS AND GORGONIANS, DEEP-SEA SPONGE AGGREGATIONS (HEXACTINELLID)(HXY)</b><br>Thick ferromanganese crust colonized by colonies of stony octocorals ( <i>Corallium</i> spp.) and gorgonians as well as hexactinellid sponges |

**Table S3.** Summary of the ROV-mounted CTD mass water parameters, VME codes and deep-sea habitat types.

| Case   | Site          | Depth<br>Min.<br>(m) | Depth<br>Max.<br>(m) | T<br>Min.<br>°C | T<br>Max.<br>°C | Salinity<br>Min.<br>psu | Salinity<br>Max.<br>psu | DO<br>Min.<br>mL·L <sup>-1</sup> | DO<br>Max.<br>mL·L <sup>-1</sup> | Potential<br>Density<br>Min.<br>kg m <sup>-3</sup> | Potential<br>Density<br>Max.<br>kg m <sup>-3</sup> | VME Code | Deep-Sea Habitats                                                          |
|--------|---------------|----------------------|----------------------|-----------------|-----------------|-------------------------|-------------------------|----------------------------------|----------------------------------|----------------------------------------------------|----------------------------------------------------|----------|----------------------------------------------------------------------------|
| GB     | Breogham      | 789                  | 1175                 | 11              | 11.5            | 35.9                    | 36.1                    | 5.4                              | 5.5                              | 27.353                                             | 27.431                                             | CSS      | Scleractinian reefs                                                        |
| GB     | Castelao      | 830                  | 860                  | 11.25           | 11.25           | 35.8                    | 35.9                    | 5.5                              | 5.5                              | 27.353                                             | 27.431                                             | CSS      | Scleractinian reefs                                                        |
| GoC    | Mercator MV   | 350                  | 360                  | 12.5            | 12.5            | 35.75                   | 35.75                   | 4.75                             | 4.75                             |                                                    |                                                    | DMO      | Deep-sea sponge aggregations                                               |
| GoC    | Mercator MV   | 350                  | 350                  | 12.5            | 12.5            | 35.75                   | 35.75                   | 4.75                             | 4.75                             |                                                    |                                                    | CXV      | Chemosynthesis-based habitats                                              |
| GoC    | Mercator MV   | 365                  | 370                  | 12.5            | 12.5            | 35.75                   | 35.75                   | 4.75                             | 4.75                             |                                                    |                                                    | NTW      | Sea-pen communities                                                        |
| GoC    | Mercator MV   | 370                  | 380                  | 12.5            | 12.5            | 35.75                   | 35.75                   | 4.75                             | 4.75                             |                                                    |                                                    | CTC      | Cerianthid communities                                                     |
| GoC    | Yuma MV       | 1092                 | 1092                 | 9.67            | 9.96            | 35.7                    | 36.1                    | 4.73                             | 5.08                             | 32.05                                              | 32.05                                              | CXV      | Chemosynthesis-based habitats                                              |
| GoC    | Yuma MV       | 1092                 | 1092                 | 9.67            | 9.96            | 35.7                    | 36.1                    | 4.73                             | 5.08                             | 32.05                                              | 32.05                                              | NTW-LITH | Sea-pen communities & deep-sea<br>sponge agregations (lithistid)           |
| GoC    | Yuma MV       | 1092                 | 1092                 | 9.67            | 9.96            | 35.7                    | 36.1                    | 4.73                             | 5.08                             | 32.05                                              | 32.05                                              | GGW-CSS  | Aggregations of gorgonians<br>scleractinians & antipatharians              |
| GoC    | Las Negras MV | 1360                 | 1360                 | 9.5             | 9.5             | 36                      | 36                      | 5.25                             | 5.25                             | 34.9                                               | 34.9                                               | CXV      | Chemosynthesis-based habitats                                              |
| GoC    | Las Negras MV | 1360                 | 1360                 | 9.5             | 9.5             | 36                      | 36                      | 5.25                             | 5.25                             | 34.9                                               | 34.9                                               | NTW      | Sea-pen communities                                                        |
| GoC    | Las Negras MV | 1360                 | 1360                 | 9.5             | 9.5             | 36                      | 36                      | 5.25                             | 5.25                             | 34.9                                               | 34.9                                               | AJZ-DMO  | Aggregations of soft corals &<br>desmosponges                              |
| GoC    | Madrid MV     | 1390                 | 1390                 | 8.8             | 9.18            | 36.06                   | 36.06                   | 4.87                             | 5.5                              | 34.1                                               | 34.1                                               | CXV      | Chemosynthesis-based habitats                                              |
| GoC    | Madrid MV     | 1390                 | 1390                 | 8.8             | 9.18            | 36.06                   | 36.06                   | 4.87                             | 5.5                              | 34.1                                               | 34.1                                               | GGW-CSS  | Aggregations of gorgonians<br>scleractinians & antipatharians              |
| GoC    | Madrid MV     | 1390                 | 1390                 | 8.8             | 9.18            | 36.06                   | 36.06                   | 4.87                             | 5.5                              | 34.1                                               | 34.1                                               | CTC      | Cerianthid communities                                                     |
| GoC    | Algacel MV    | 775                  | 810                  | 10              | 10.1            | 35.75                   | 35.75                   | 4.55                             | 5.02                             | 31.058                                             | 31.258                                             | CXV      | Chemosynthesis-based habitats                                              |
| GoC    | Bomjardim     | 3000                 | 3000                 | 3.2             | 3.2             | 35.15                   | 35.15                   | 0.64                             | 0.64                             | 39.966                                             | 39.966                                             | CXV      | Chemosynthesis-based habitats                                              |
| PoL    | M1dome        | 828                  | 828                  | 10              | 10.1            | 35.75                   | 35.75                   | 4.8                              | 4.8                              | 31.058                                             | 31.058                                             | HXY-ATX  | Deep-sea Hexactinellid sponge<br>agregations & actiniarian<br>aggregations |
| PoL    | Volcanicridge | 1019                 | 1092                 | 7.3             | 7.73            | 35.35                   | 35.35                   | 4.33                             | 4.33                             | 32.425                                             | 32.25                                              | CSS-AJZ  | Aggregations of stony octocorals &<br>soft corals                          |
| PoL    | ETP Pool      | 1270                 | 1279                 | 7.33            | 7.73            | 35.35                   | 35.35                   | 4.08                             | 4.62                             | 32.433                                             | 32.433                                             | CTC      | Cerianthis communities                                                     |
| PoL    | ETP Pool      | 1270                 | 1279                 | 7.33            | 7.73            | 35.35                   | 35.35                   | 4.08                             | 4.62                             | 32.433                                             | 32.433                                             | DMO      | Deep-sea desmosponge aggregations                                          |
| PoL    | Volcancito    | 1119                 | 1265                 | 7.44            | 7.7             | 35.35                   | 35.35                   | 4.32                             | 4.32                             | 32.725                                             | 32.725                                             | CSS-AJZ  | Aggregations of stony octocorals &<br>soft corals                          |
| Tagoro | Summit        | 89                   | 120                  | 18.75           | 18.75           | 36.92                   | 36.92                   | 4.32                             | 4.32                             | 26.98                                              | 26.98                                              | CXV-VOL  | Low T-hydrothermal bacterial<br>communities                                |
| Tagoro | Flanks        | 150                  | 200                  | 13.82           | 13.82           | 36.1                    | 36.1                    | 6.44                             | 6.44                             | 27.5                                               | 27.5                                               | CXV-VOL  | Volcanic caves                                                             |

## References

1. Somoza, L. UTM-CSIC. 2018. BREGHAM Cruise, RV Hespérides [Data set]. UTM-CSIC. Available online: <https://doi.org/10.20351/29HE20050906> (accessed on 1 December 2020).
2. Urgorri, V. UTM-CSIC. 2018. DIVA-ARTABRIA-II Cruise, RV Sarmiento de Gamboa [Data set]. UTM-CSIC. Available online: <https://doi.org/10.20351/29SG20090930> (accessed on 1 December 2020).
3. Somoza, L. UTM-CSIC. 2018 MVSEIS Cruise, RV Hespérides [Data set]. UTM-CSIC. Available online: <https://doi.org/10.20351/29HE20080516> (accessed on 1 December 2020).
4. Somoza, L.; Vázquez, J.T.; Campos, A.; Afonso, A.; Calado, A.; Fernández-Puga, M.C.; González, F.J.; Fernández-Salas, L.M.; Ferreira, M.; Sanchez-Guillamón, O.; et al. Informe Científico-Técnico Campaña SUBVENT-2, 2014, 43 pp. Available online: [http://info.igme.es/SidPDF/166000/941/166941\\_0000001.pdf](http://info.igme.es/SidPDF/166000/941/166941_0000001.pdf) (accessed on 1 December 2020).
5. Somoza, L. MOUNDFORCE cruise, RV L'Atalante. 2007. Available online: <https://doi.org/10.17600/7010160> (accessed on 1 December 2020).
6. Somoza, L.; Vázquez, J.T.; Moya, A.J.; Medialdea, T.; Fernández-Sala, L.M.; León, R.; Palomino, D.; Vargas, I.; González, F.J.; López-Rodríguez, M.; et al. Informe Científico-Técnico Campaña GAIRE-MAEC, 2011, 258 pp. Available online: [http://info.igme.es/SidPDF/166000/924/166924\\_0000001.pdf](http://info.igme.es/SidPDF/166000/924/166924_0000001.pdf) (accessed on 1 December 2020).
7. Somoza, L. UTM-CSIC. 2018. AMULEY Cruise, RV Hespérides, [Data set]. UTM-CSIC. Available online: <http://dx.doi.org/10.20351/29HE20120507> (accessed on 1 December 2020).
8. Vázquez, J.T.; Somoza, L.; Rengel, J.A.; Medialdea, T.; Millán, A.; Alcalá, C.; González, F.J.; Jiménez, P.; León, R.; López-González, N.; et al. Informe científico-técnico de la campaña oceanográfica DRAGO0511. Ampliación de la plataforma continental de España al oeste de las islas Canarias, 2011, 273 pp. Available online: <http://hdl.handle.net/10508/451> (accessed on 1 December 2020).
9. Vázquez, J.T.; Somoza, L.; Espinosa González, S.; Yanguas Guerrero, F.; Fernández-Salas, L.M.; Fraile-Nuez, E.; González, F.J.; León, R.; López-González, N.; López Pamo, E.; et al. Informe Científico-Técnico de la campaña SUBVENT-1, 2013, 255 pp. Available online: <http://hdl.handle.net/10508/1613> (accessed on 1 December 2020).
